# Supplementary material for: Upscaling of regional models into basin-wide models
Source: Copernicus journal article supplement (doi:10.5194/os-2018-79), 2018-07-19
Supplement: Supplementary file [file os-2018-79-AC3-supplement.pdf]

# Upscaling of regional models into basin-wide models

## Reviewer 2 General Comment

The paper presents the upscaling technique as a relevant scientific question in the operational model community, however it needs a lot of revisions to make it more a scientific paper than a technical report.

The English could be improved and detailed suggestions have been given but the reviewer is not mother tongue, thus take them carefully. The description of the methodology, results and conclusions appears sometime superficial and needs to be improved to be more complete and precise to allow their reproduction by fellow scientists. The figures must show always the same models (NW-Med, MED and upscaled). Labels, legends must be enlarged and captions improved. The RMSD could always be provided (MED-NW-Med and Upscaled-NWMed), and eventually be summarized in a table for the 5 metrics. The models' nomenclature should be consistent throughout the manuscript. Some references are missing.

The underlying assumption that the child model has a better performance is only stated in the conclusions, while it should be clearly stated in the abstract or at least in the introduction, since this is not always true due to possible phase errors (in space and time) in the higher resolution models. Moreover the upscaling technique to be more powerful could weight pseudo-obs according to their misfit with real observations assuring that the upscaling is stronger when and where the child model is closer to reality.

I recommend to accept the paper for further publication after a major revision.

We thank the reviewer for his constructive comments and suggestions, and particularly for the large amount of time devoted to correcting all kinds of small errors. We prepare a revised version of the manuscript according to the general remarks above. In particular, the figures are re-done using consistent labels and larger font sizes. References are updated and new ones are added.

We also provide an answer to each of the specific comments below, and include them in the revised manuscript.

## Specific Comments

### Abstract

Line 5: *Therefore* instead of *therefor* and I would take out “*in practice*”

Changed to *Therefore*

Line 6: ...” to replace the missing model feedback...” I would insert “*child model or high resolution model*”. Done

Line 10: I suggest to rephrase something like:

“A basin scale model simulation is compared to one simulation..., and another model analysis which applies the upscaling technique...”

Changed

### Introduction

Line 15: “reanalyses, analyses and forecasts” Changed

Line 16: “ ...by different institutes within the regional monitoring and forecasting centers..”

Changed

Line 24: could you insert a reference for this? We rephrased the sentence instead

Line 6 page 2: I would take out “in this article” Removed

Line 12 page 2: I would substitute *basin-scale* with *regional* Changed

Line 13 page 2: “...in the basin-scale model, ... is to obtain” Changed

Line 14 page 2: “(along with...)” Changed

Please rephrase the entire sentence, it seems too informal to me Rephrased

Line 16 page 2: I suggest “...to the child model will progressively gain consistency with the child model solution within its domain, being beneficial for the child model over time.” Changed

Line 20 page 2: do you have references for this? Added Mason et al 2010, Debreu et al 2012

Line 21 page 2: Is this pertinent? I do not see the connection, please explain. If we assimilate pseudo-observations coming from a nested model, and this improves our (parent) model, then the child model is a pseudo-measurement device which can be seen as a replacement for (costly) real measurement devices.

Line 26 page 2: Other re-initialization techniques have been used blending, through optimal interpolation, coarse resolution operational analyses and coastal observations in so called Rapid Environmental Assessment experiments. Please give a look at *Simoncelli et al.(2011)*, they show improvements in the nested coastal model performance using observations. Added

Line 35 page 2: I am not sure that the syntax is correct please check the English. Changed

Line 3 page 3: “Therefore acknowledging that operational..., Schulz-Stellenfleth and Stanev (2016) strongly...” Changed

### 2.1 Hydrodynamic Model

Line 13: I would substitute *tried out* with *has been implemented* Changed

Line 15: “*created by the junction of the Eastern and Western Corsican Currents*” I would cite *Pinardi et al (2015)* Added

Line 17: I would add some recent references *Pinardi et al (2015)*, *Somot et al. (2016)*, *Simoncelli and Pinardi in von Schuckman et al. (2018)*. Added

Line 21: The resolution of MFS is  $1/24^{\text{th}}$  (Clementi et al. 2017, [https://doi.org/10.25423/cmcc/medsea\\_analysis\\_forecast\\_phy\\_006\\_013](https://doi.org/10.25423/cmcc/medsea_analysis_forecast_phy_006_013)) of a degree since October 2017. The reanalysis ([https://doi.org/10.25423/medsea\\_reanalysis\\_phys\\_006\\_004](https://doi.org/10.25423/medsea_reanalysis_phys_006_004) Simoncelli et al., 2014, 2016) is still at  $1/16^{\text{th}}$ . Changed

Line 30: please specify for reproducibility issues which analyses has been used, I guess the  $1/16$ ? Or the reanalyses? Please clarify and insert the reference. Added

Line 32: ERA Interim is not at a resolution of  $1/8^{\text{th}}$  of degree, it is 0.75 degrees!!! You might have re interpolated it from  $1/8^{\text{th}}$  to  $1/16^{\text{th}}$ . Please explain it and add the Dee et al () reference of ERA Interim. [Modified and added reference](#)

Line 1 page 4: Which literature? [Removed « from the litterature »](#)

Line 2: 5 rivers' data comes from? [Various regional websites, not added in the article](#)

Line 4: Please consider the CMEMS has 39 rivers, thus it is not very much coherent. Please look at the CMEMS products descriptions and may be cite the reanalysis instead. Rivers are described in the Simoncelli et al 2016. [Added in the text that CMEMS has many more rivers](#)

Figure 1: Please increase the axis font, not readable now. I would show the two models' salinity fields to emphasize the differences due to the daily river outflow, instead of the difference. In fact, you describe the different plumes in the manuscript.

[We tried this out, but due tu large salinity variability, a side-by-side plot of salinity does not show clearly the salinity difference. Therefore we chose to show directly the difference](#)

Line 10: please describe more in detail Fig1b eventually, isn't it the difference among the two models' salinity after 1 month of simulation? Please improve also the caption.

[Yes Fig 1b is the difference of \(nested\) model salinity after 1 month, when using climatological Rhone discharge or real, daily discharge. This is now written more clearly in the caption](#)

## 2.2

Line 16: I would re-phrase something like "*In order to assimilate ..., different set ups could be implemented (adopted, applied) depending on ...*" [Changed](#)

Line 21: please improve the description of the settings, it contains repetitions.

Line 23-25: Start a new phrase please and please say something more about the statement that the T and S pseudo-obs are considered independent. You mean that you assume that even if it is not the case. You assimilate the full resolution 3D T and S fields? None thinning? Please motivate a bit this part. The word *also* could be neglected and substitute ";". It looks like you wrote this in a rush without much care. [Improved lines 21-25 as suggested](#)

[As the reviewer correctly supposed, we do perform thinning \(in the horizontal\), and this is now also written in the text. We apologize for forgetting to write it in the article first submitted](#)

Line 31: random not randon [Changed](#)

Line 7 Page 5: Why did you select 1 month of spin up time? Please start a new phrase and integrate a bit on that. What you use in the evaluation is the ensemble mean of the 100 members?

[In a previous \(single\) model spin-up, we noticed that the kinetic energy reaches a more-or-less stable value in just a few days, therefor a spin-up of 1 month was considered sufficient. The same is supposed for the ensemble members. As we are now running an ensemble of 100 members, longer spin-up would translate into large computational cost.](#)

Line 1 Page 6: it is not clear to me "*...and its addition observation localization*", could you please explain?

It is explained just afterwards (lines 2-3. In means that the model domain is cut into subdomains (water columns in our case) where the analysis is performed separately. Moreover, in each subdomain, only relevant observations are considered (i.e. observations that are far away and will have no impact, are not considered during the computation).

Line 7: many are the sensitivity experiments with different observation errors, maybe you could insert a table.

We agree that there are 4 experiments (each with a value for temperature and salinity observation errors), but these all fit into 1 line in the text. Maybe it is easier to keep them in the text ?

### **3. Metrics**

Line 17: Please add something about: .. these metrics have been computed to compare model solutions. What do you want to show? Upscaling model solution (is it an ensemble mean of the 100 members?) with the basin scale simulation?

Added some explanation to Line 17. About the « upscaled » model, we keep one unperturbed ensemble member. The other 99 members of the ensemble are perturbed and are used only to create the model error space. All 100 members are updated daily by the data assimilation procedure.

#### **3.1**

Line 23: see previous comment. What do you want to show? Does this metric tell you if the upscaling procedure is driving the upscaled model solution towards the NW-Med? Please integrate a bit.

Yes exactly, we want to see if the upscaling procedure pushes the parent model towards the NW-Med model. This is now explained better at line 23.

#### **3.2**

Line 28: again, see previous comments. I would integrate at the beginning of the section, and in each sub-section I would state what exactly is expected from each metrics.

### 3.3

I do not really understand what you are going to present in the results. Plume length/direction from the free and upscaled models? The comparison model-obs using sat chlla images?

“Furthermore,...” What does it mean you do it qualitatively, quantitatively, both?

Yes we compare plume length and directions in between models, and also between model and real observations. This is different compared to the previous metrics where we did not have real measurements. This is now better explained in the text.

### 3.4

ok

### 3.5

Line 15: What do you mean bay “depth is larger than 1000m”? Is it the depth reached by deep convection? Maybe you want to put it at the end of the first phrase at line 13. Here you are describing the WMDW characteristics.

Following Bosse at al (2015), we consider that water is WMDW if it is within a certain T and S range, AND if it is situated below 1000m depth

Line 17: Which tail? How could the river see that? Please explain or describe with some detail.\ Bosse et al (2015) show the T-S diagram and indicated the water masses (left plot below). We reproduce this plot from model results (right plot below) and obtain a longer tail (it goes to ~12.7°C and slightly lower than 38.45 psu).The definition from Bosse at al (2015) would result only in the red rectangle in the right plot below. Therefore we slightly adapt the WMDW definition in order to capture the whole tail. We decided not to include these 2 figures in order to keep the paper more concise.

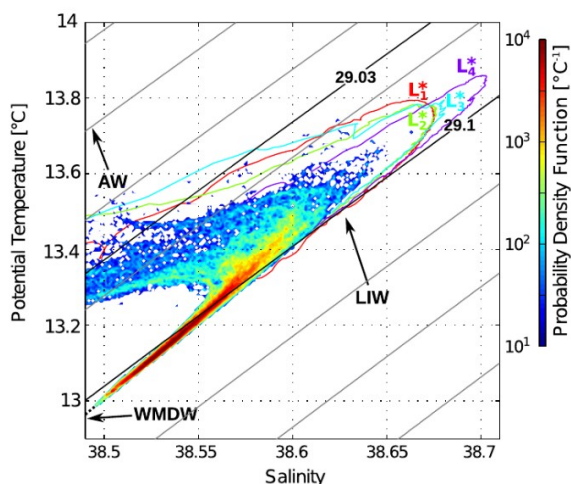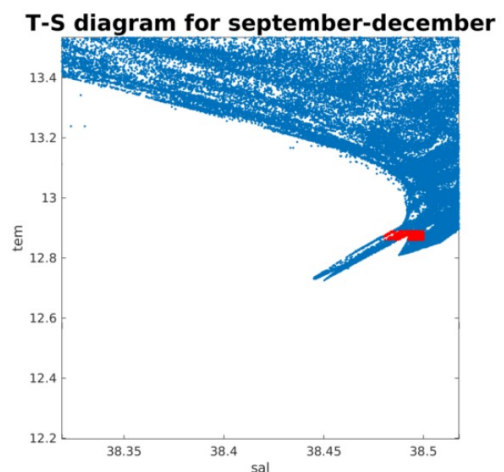

## 4. Results

Figure 3: please enlarge the font. [Changed](#)

Line 5: The difference of what? [Temperature, added in the text and in figure caption](#)

Line 9: Isn't it Fig.1b the difference between unperturbed parent and child model in salinity after 1 month of spin up? [Fig 1b is the salinity difference of the nested model, when forced with climatological or with real Rhone river discharge data. Figure 3 is the difference between parent and nested model \(for temperature\), and the equivalent for salinity is not shown in the article](#)

Line 10: Why should I trust the child model more than the parent? You did not provide any model performance. It is not easy to improve significantly the smooth solution of the coarse parent model (phase errors are common).

[Also following recommendation from reviewer 1, we now stated clearly that we suppose from the start that the nested model is better \(in some sense\) than the parent. We do not try to prove the hypothesis is actually valid, and sometimes, it could be wrong. Exactly as the reviewer points out, when the nested model represents small scales that are actually out of phase with reality, it could have higher RMS errors than the parent model that does not represent small scales at all.](#)

[But supposing that the nested model is « better », our objective with upscaling is to bring the parent model closer to the nested model \(i.e. emulate nesting feedback\). This is now written in the introduction.](#)

Figure 4: please include a line to indicate the section location on the map. [Done](#)

Line 16: The scope of Figure 5 is to show that the upscaling technique is bringing the upscaled model close to the NW-Med one. RMS difference could be provided towards the satellite SST to show this. However, this rise the question: “ why don't you consider to weight the assimilation of pseudo observations according to the misfit with the observed SST, giving more weight where the pseudo-obs are loser to sat obs? Please keep the same notation to call the models (MED, NW-Med...).

[This is an interesting suggestion but has also the following limitation. If we have many observations to validate the nested model, then we could as well assimilate these \(real\) observations into the parent model. Upscaling is interesting mostly when there are few or no real observations.](#)

[In the case of SST however, it is a very interesting suggestion. When the nested model is well-validated by SST, maybe we can trust it more also for other variables and assimilate those in the parent model to complement the \(real\) SST observations. This could be the topic of a follow-up study.](#)

[Please switch 4.1 and 4.2 \(thus fig. 6 and 7\) to be consistent with 3.1 and 3.2. Done, we rather switched 3.1 and 3.2](#)

### 4.1

Line 21: For which models? [Parent model, free and upscaled. Added in the text](#)

Line 2 Page 9: Why the NW-Med model is not shown in Figure 6? Please include it for consistency in presenting the results, since you want to prove that the upscaled model is driven towards the NW-Med solution. Again please keep the same nomenclature to facilitate the reader. Moreover RMSD could be computed as in 4.2 case.

[Please see the answer to comment 4.2 \(Fig. 7\)](#)

Lines 9-12: What is this meaning? Is this correct? Is this coherent with NW-Med?

Yes it can be seen from the figure that both lines are closer one-to-the-other after the first month. There is also a temporal delay in between the 2 curves in August-September. The text merely describes this.

Figure 6: please increase the font in the legend and include NW-Med.

We will modify the figure fonts

## 4.2

Figure 7: Please insert NW-Med and the legend.

Once upscaling modifies the parent model, the child model gets different open-sea boundary conditions from the parent, and starts to be different as well. Thus, for Figures 6 and 7, we could add 2 NW-Med curves to the figures (one corresponding to the free run and one corresponding to the upscaling run). For the Northern Current intensity, it gives this :

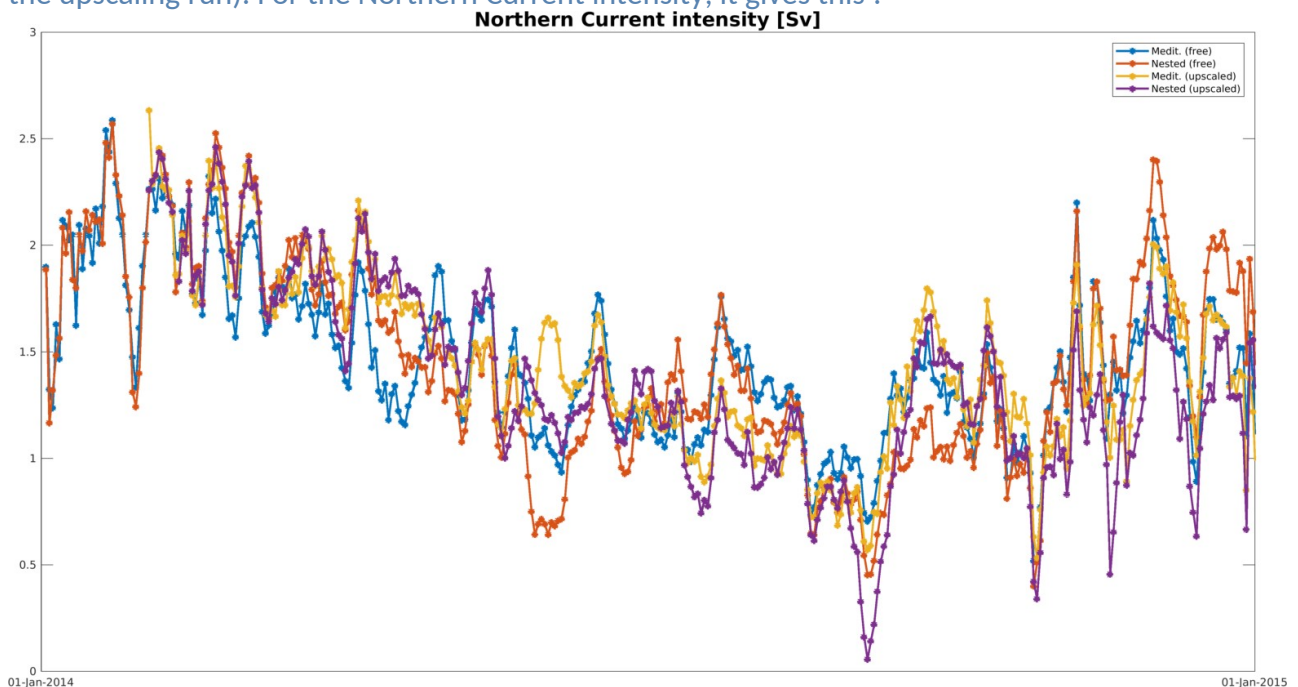

This figure becomes difficult to interpret. There is no general trend, like for example a systematically more intense Northern Current in nested models. However, what's interesting is that generally speaking, compared to the free Med model (blue curve), the yellow curve seems to get closer to the purple (child model of the upscaled Med model). The discrepancy between yellow and purple is smaller than the discrepancy between blue and red. This can be verified by looking at RMSD errors between parent and child model in the two cases (free model or upscaled model), respectively 0.22 and 0.19 Sv. The RMSD for all metrics have now been included in a table as suggested by the reviewer.

Lines 4 -6Page 11: I suggest to rephrase “...this metrics cannot **be** used to compare and validate the models since observations are not available to compute the real NC transport. However, it shows that upscaling of..”

But the metric *can* be used to inter-compare models, so it might be confusing to say « this metric cannot be used to compare ... ». Therefore we rephrased as :

« For the purpose of our study, this metric cannot be used to validate the model since real measurements of the Northern Current transport are not available; but (as for the previous metric), it can be used to compare models, ... »

### 4.3

As for the other metrics I would include the NW-Med to show its consistency with the upscaled model. At Line 15 you mention the nested (NW-Med) model but it is not shown. RMSD could be computed again as more robust argument of your results.

On Fig. 8, the arrows for the upscaled and (not-shown) NW-MED models superpose and are indistinguishable

Line 17: a quantitative estimate of model performance can be provided again by RMSD of MED, and upscaled model towards NW-Med.

We have computed the RMSD and included it in a table

Figure 9: This figure presents MED and NW-Med, why not the upscaled model? I suggest to show the three salinity fields.

It is indistinguishable from the nested model

Line 3 Page 12: Is the increase in salinity observed, is it consistent with observations or only with NW-Med? I would include validation with observations, since a lot of them should be available by REP in situ observations from CMEMS.

We agree that it could be checked whether it is realistic or not. However even if it is *not* realistic, if the nested model predicts it, and upscaling can make the parent model predict it as well, then upscaling is doing what we hoped. Our hypothesis is always that the nested model is « better ». In other words, if nesting predicts a saltier Corsican Current core, but it is actually not true, what do we hope from upscaling ? That the parent model also increases salinity in the core, or not ? For this reason, we actually did not check if the nested model is more realistic or not. There are lots of other papers showing the impact of nesting.

### 4.4

Figure 10 should be mentioned since the beginning of the paragraph to help the reader.

Done

Please harmonize the models' nomenclature in the text but also in the legend and caption of figure 10. The validation (actually the only one that is provided with observations) should cover the entire 2014 year and not only two months.

In the text is written : « A similar plot for the whole of 2014 shows that the situation worsens during summer (errors of 3 °C) both for parent and child model; the difference in between models is hidden by the temporal variability of the error (not shown). »

If we plot the entire year, due to the scale going to 3°C instead of 1.4°C, we would almost not distinguish the red, black and blue curves anymore at all.

The mean RMSE of the three models should be provided as well to support your results.

Upscaling should consider the performance of the child model and assimilate only, or give more weight, in those parts of the domain where the child model is close to observations. Without considering models' performance upscaling could force the parent model towards a wrong solution.

This comment is related to a suggestion higher in the review. We agree that this could be a way forward for SST, but maybe in a follow-up study. Apart from SST, for the other metrics, there are no (real) data to choose whether or not to trust the nested model. The hypothesis of this study is that the nested model is better, and the objective is to bring the parent model closer to the nested model.



Lines 6-8 Page 13: why not? REP in situ temperature and salinity profiles are available from CMEMS. I encourage to look at them and compute some validation to make your paper more robust.

This comment is again related to the previous one, and other ones before. In this study, we **only** aim at bringing the parent model closer to the nested model. Validating the nested model, such as doing a QUID for it, is out of our scope (and a whole lot of work).

On this occasion of in-depth temperature, we remembered the reader of the hypothesis and objective of the paper.

Line 8: “Upscaling is able to bring the differences back to the parent model” or the child model?  
We rephrased this so that is it more clear

#### 4.5

Here you mention also the child-model of the upscaled model and you speculate without any proof about the largest consistency in the nested upscaled models. I recommend to include a figure to show it. Or if you want to use Fig. 11 please give the RMSD of the model couples or include a specific comment to the figure (Line 7-8?)

We have added a table with the RMSD of model couples, as suggested by the reviewer

Line 10: Therefore Changed

### 5. Conclusions

Lines 4-9 Page 15: “The underlining hypothesis...” You only state it in the conclusions while it should be written clearly both in the abstract and the introduction. In this way the reader is aware

that you only aim to relax the child model solution to the parent model solution, independently from the model performances.

Yes exactly. Sorry for this. It is now written in the introduction

Line 13: please use child instead of nested. [changed](#)

Line 15: Please be more precise and refer to the figures when this is shown. [changed](#)

Lines 1-6 Page 16: This general statement might confuse the reader since your child models never assimilate observations. Please rephrase to underline this. [Rephrased](#)

Line 6: please include a reference since you do not show this in the paper. [Changed the text](#)

Line 7-end: The advantage might be real is the upscaled solution has a better skill towards observations. In the last phrase: If the high resolution model is upscaled into the basin-scale one? Please notice that in CMEMS regional systems are the basin-scale ones.

[We added explicitly in the text the potential disadvantages of the method, which include the fact that the nested model may be worse than the parent.](#)
